# Supplementary material
Source: PubMed Central journal article supplement (PMC5540644)
Supplement: NIHMS880783-supplement-Supplemental_Material.pdf [file NIHMS880783-supplement-Supplemental_Material.pdf]

## SUPPLEMENTAL MATERIAL

Supplemental Table I: ICD-9-CM codes used to define heart failure.

| Code   | Description                                                                                                                                             |
|--------|---------------------------------------------------------------------------------------------------------------------------------------------------------|
| 398.91 | Rheumatic heart failure (congestive)                                                                                                                    |
| 402.01 | Malignant hypertensive heart disease with heart failure                                                                                                 |
| 402.11 | Benign hypertensive heart disease with heart failure                                                                                                    |
| 402.91 | Unspecified hypertensive heart disease with heart failure                                                                                               |
| 404.01 | Hypertensive heart and chronic kidney disease, malignant, with heart failure and with chronic kidney disease stage i through stage iv, or unspecified   |
| 404.03 | Hypertensive heart and chronic kidney disease, malignant, with heart failure and with chronic kidney disease stage v or end stage renal disease         |
| 404.11 | Hypertensive heart and chronic kidney disease, benign, with heart failure and with chronic kidney disease stage i through stage iv, or unspecified      |
| 404.13 | Hypertensive heart and chronic kidney disease, benign, with heart failure and chronic kidney disease stage v or end stage renal disease                 |
| 404.91 | Hypertensive heart and chronic kidney disease, unspecified, with heart failure and with chronic kidney disease stage i through stage iv, or unspecified |
| 404.93 | Hypertensive heart and chronic kidney disease, unspecified, with heart failure and chronic kidney disease stage v or end stage renal disease            |
| 428.0  | Congestive heart failure unspecified                                                                                                                    |
| 428.1  | Left heart failure                                                                                                                                      |
| 428.20 | Unspecified systolic heart failure                                                                                                                      |
| 428.21 | Acute systolic heart failure                                                                                                                            |
| 428.22 | Chronic systolic heart failure                                                                                                                          |
| 428.23 | Acute on chronic systolic heart failure                                                                                                                 |
| 428.30 | Unspecified diastolic heart failure                                                                                                                     |
| 428.31 | Acute diastolic heart failure                                                                                                                           |
| 428.32 | Chronic diastolic heart failure                                                                                                                         |
| 428.33 | Acute on chronic diastolic heart failure                                                                                                                |
| 428.40 | Unspecified combined systolic and diastolic heart failure                                                                                               |
| 428.41 | Acute combined systolic and diastolic heart failure                                                                                                     |
| 428.42 | Chronic combined systolic and diastolic heart failure                                                                                                   |
| 428.43 | Acute on chronic combined systolic and diastolic heart failure                                                                                          |
| 428.9  | Heart failure unspecified                                                                                                                               |

Supplemental Table II: HF patient characteristics and comorbidities nationally by sex for 2002, 2007, 2013 from the National Inpatient Sample.

|                                 | 2002   |        | 2007   |        | 2013   |        |
|---------------------------------|--------|--------|--------|--------|--------|--------|
|                                 | Male   | Female | Male   | Female | Male   | Female |
| <b>Age</b>                      | 70.49  | 74.90  | 69.86  | 74.97  | 69.98  | 74.64  |
| <b><u>Race/Ethnicity</u></b>    |        |        |        |        |        |        |
| White                           | 70.51% | 70.31% | 65.82% | 67.25% | 67.22% | 67.93% |
| Black                           | 17.65% | 18.31% | 20.41% | 19.79% | 19.93% | 20.13% |
| Hispanic                        | 7.18%  | 7.08%  | 8.07%  | 7.59%  | 7.91%  | 7.33%  |
| Asian/PI                        | 1.68%  | 1.52%  | 1.78%  | 1.83%  | 2.01%  | 1.93%  |
| <b><u>Census Region</u></b>     |        |        |        |        |        |        |
| New England                     | 4.72%  | 4.81%  | 6.36%  | 6.77%  | 4.85%  | 5.11%  |
| Mid Atlantic                    | 16.26% | 16.34% | 13.27% | 12.92% | 14.95% | 15.12% |
| East North Central              | 15.99% | 16.77% | 18.15% | 18.79% | 16.31% | 17.20% |
| West North Central              | 7.10%  | 7.34%  | 5.78%  | 6.33%  | 6.13%  | 6.23%  |
| South Atlantic                  | 26.73% | 25.95% | 25.40% | 24.75% | 22.07% | 21.77% |
| East South Central              | 5.41%  | 6.40%  | 4.37%  | 4.59%  | 7.29%  | 8.12%  |
| West South Central              | 8.03%  | 7.83%  | 10.28% | 10.58% | 11.32% | 11.26% |
| Mountain                        | 2.12%  | 1.95%  | 4.04%  | 3.29%  | 4.58%  | 3.79%  |
| Pacific                         | 13.65% | 12.62% | 12.36% | 11.98% | 12.50% | 11.40% |
| <b><u>Hospital Size</u></b>     |        |        |        |        |        |        |
| Small                           | 12.20% | 13.02% | 12.71% | 14.37% | 14.48% | 15.85% |
| Medium                          | 25.29% | 26.44% | 26.28% | 27.38% | 26.73% | 27.31% |
| Large                           | 62.51% | 60.54% | 61.01% | 58.25% | 58.79% | 56.84% |
| <b><u>Hospital Location</u></b> |        |        |        |        |        |        |
| Rural                           | 17.60% | 19.81% | 14.52% | 16.78% | 13.22% | 15.19% |
| Urban, nonteaching              | 45.48% | 45.81% | 44.54% | 45.37% | 38.88% | 39.68% |
| Urban, teaching                 | 36.92% | 34.38% | 40.94% | 37.85% | 47.90% | 45.14% |
| <b><u>Primary Payer</u></b>     |        |        |        |        |        |        |
| Medicare                        | 72.66% | 79.41% | 69.88% | 78.14% | 70.27% | 79.63% |
| Medicaid                        | 6.18%  | 6.88%  | 7.54%  | 7.38%  | 8.64%  | 7.49%  |
| Private insurance               | 15.77% | 10.90% | 15.20% | 10.50% | 13.12% | 8.96%  |
| Self-pay                        | 3.11%  | 1.62%  | 4.28%  | 2.33%  | 4.59%  | 2.32%  |
| No charge                       | 0.27%  | 0.16%  | 0.52%  | 0.30%  | 0.51%  | 0.24%  |
| Other                           | 1.93%  | 1.00%  | 2.41%  | 1.23%  | 2.70%  | 1.24%  |
| <b><u>Comorbidities†</u></b>    |        |        |        |        |        |        |
| HTN                             | 57.08% | 60.42% | 64.73% | 66.04% | 70.96% | 70.55% |
| CAD                             | 30.55% | 24.20% | 32.00% | 26.62% | 34.92% | 28.39% |
| Atrial fibrillation             | 14.55% | 10.92% | 17.02% | 12.33% | 19.54% | 14.91% |
| Obese                           | 17.35% | 20.39% | 19.65% | 20.90% | 30.97% | 34.50% |
| Valve disease                   | 15.60% | 18.36% | 18.70% | 21.71% | 21.57% | 23.76% |
| VT                              | 6.24%  | 3.67%  | 7.56%  | 4.31%  | 8.49%  | 5.09%  |
| AMI                             | 1.72%  | 1.62%  | 1.96%  | 1.72%  | 2.36%  | 2.00%  |
| PVD                             | 4.25%  | 4.14%  | 5.05%  | 4.84%  | 6.77%  | 6.51%  |
| DM                              | 30.85% | 36.26% | 32.79% | 38.55% | 37.67% | 40.88% |
| COPD                            | 18.26% | 16.37% | 18.13% | 17.30% | 17.62% | 17.97% |
| Anemia                          | 15.40% | 24.16% | 18.56% | 28.57% | 25.91% | 36.56% |
| Fluid/electrolyte               | 18.86% | 19.20% | 23.25% | 24.99% | 31.69% | 31.97% |

PI = Pacific Islander, HTN = hypertension, CAD = coronary artery disease, VT = ventricular tachycardia, AMI = acute myocardial infarction, PVD = peripheral vascular disease, DM = diabetes mellitus, COPD = chronic obstructive pulmonary disease.

† Age-standardized proportions to 2000 U.S. standard population.

Supplemental Table III: HF patient characteristics and comorbidities nationally by race/ethnicity for 2002, 2007, 2013 from the National Inpatient Sample.

|                                 | 2002   |        |          |        | 2007   |        |          |        | 2013   |        |          |        |
|---------------------------------|--------|--------|----------|--------|--------|--------|----------|--------|--------|--------|----------|--------|
|                                 | White  | Black  | Hispanic | Asian  | White  | Black  | Hispanic | Asian  | White  | Black  | Hispanic | Asian  |
| <i>Age</i>                      | 75.67  | 63.96  | 69.28    | 72.57  | 76.06  | 62.93  | 67.62    | 71.90  | 75.39  | 63.36  | 68.96    | 71.53  |
| <i>Female</i>                   | 54.67% | 55.65% | 54.37%   | 52.28% | 51.88% | 50.56% | 49.78%   | 51.97% | 49.28% | 49.41% | 47.17%   | 47.98% |
| <b><i>Census Region</i></b>     |        |        |          |        |        |        |          |        |        |        |          |        |
| <i>New England</i>              | 5.85%  | 1.88%  | 2.90%    | 1.82%  | 8.49%  | 2.48%  | 3.40%    | 2.14%  | 6.21%  | 2.00%  | 3.50%    | 2.43%  |
| <i>Mid Atlantic</i>             | 18.63% | 11.04% | 8.40%    | 5.91%  | 12.98% | 13.12% | 12.94%   | 10.59% | 15.05% | 14.62% | 13.39%   | 10.84% |
| <i>East North Central</i>       | 17.12% | 16.46% | 11.15%   | 11.86% | 18.57% | 21.90% | 10.34%   | 10.79% | 17.92% | 18.01% | 5.74%    | 8.51%  |
| <i>West North Central</i>       | 7.92%  | 7.51%  | 1.55%    | 1.84%  | 7.36%  | 4.26%  | 1.55%    | 2.35%  | 7.42%  | 4.28%  | 1.93%    | 2.32%  |
| <i>South Atlantic</i>           | 24.50% | 36.82% | 21.53%   | 8.60%  | 23.68% | 33.07% | 19.91%   | 12.26% | 19.47% | 34.30% | 17.56%   | 7.19%  |
| <i>East South Central</i>       | 5.70%  | 8.77%  | 2.56%    | 1.47%  | 4.84%  | 3.87%  | 2.01%    | 1.31%  | 9.50%  | 5.82%  | 0.78%    | 0.66%  |
| <i>West South Central</i>       | 6.32%  | 7.25%  | 23.42%   | 5.44%  | 9.49%  | 11.31% | 17.82%   | 3.72%  | 9.76%  | 12.28% | 21.67%   | 5.26%  |
| <i>Mountain</i>                 | 2.23%  | 1.12%  | 1.75%    | 1.83%  | 3.83%  | 2.04%  | 5.24%    | 2.65%  | 4.48%  | 1.81%  | 7.01%    | 4.02%  |
| <i>Pacific</i>                  | 11.74% | 9.14%  | 26.73%   | 61.21% | 10.76% | 7.95%  | 26.79%   | 54.19% | 10.18% | 6.90%  | 28.41%   | 58.74% |
| <b><i>Hospital Size</i></b>     |        |        |          |        |        |        |          |        |        |        |          |        |
| <i>Small</i>                    | 13.92% | 8.56%  | 9.23%    | 21.12% | 14.98% | 10.85% | 8.55%    | 14.30% | 16.47% | 11.97% | 11.88%   | 14.28% |
| <i>Medium</i>                   | 25.00% | 27.87% | 31.51%   | 25.39% | 26.63% | 26.78% | 27.22%   | 36.18% | 26.75% | 27.39% | 29.79%   | 24.91% |
| <i>Large</i>                    | 61.09% | 63.57% | 59.25%   | 53.49% | 58.39% | 62.37% | 64.23%   | 49.53% | 56.78% | 60.64% | 58.33%   | 60.80% |
| <b><i>Hospital Location</i></b> |        |        |          |        |        |        |          |        |        |        |          |        |
| <i>Rural</i>                    | 21.33% | 12.26% | 11.71%   | 11.69% | 18.36% | 10.50% | 7.33%    | 3.69%  | 17.40% | 7.47%  | 5.59%    | 5.84%  |
| <i>Urban, nonteaching</i>       | 47.97% | 35.99% | 49.08%   | 49.17% | 48.54% | 34.49% | 44.82%   | 44.77% | 41.23% | 30.41% | 44.87%   | 47.42% |
| <i>Urban, teaching</i>          | 30.70% | 51.76% | 39.21%   | 39.14% | 33.11% | 55.01% | 47.85%   | 51.54% | 41.38% | 62.12% | 49.54%   | 46.73% |
| <b><i>Primary Payer</i></b>     |        |        |          |        |        |        |          |        |        |        |          |        |
| <i>Medicare</i>                 | 81.85% | 60.86% | 66.99%   | 64.88% | 81.41% | 57.35% | 59.88%   | 66.59% | 81.30% | 59.70% | 63.61%   | 65.27% |
| <i>Medicaid</i>                 | 3.50%  | 14.70% | 13.13%   | 13.68% | 3.29%  | 15.41% | 19.18%   | 14.93% | 4.05%  | 17.06% | 16.15%   | 15.12% |
| <i>Private Insurance</i>        | 12.15% | 16.56% | 12.96%   | 16.84% | 11.87% | 16.18% | 11.74%   | 13.95% | 13.79% | 9.98%  | 12.72%   | 11.63% |
| <i>Self-Pay</i>                 | 1.24%  | 5.14%  | 4.61%    | 3.02%  | 1.74%  | 7.31%  | 5.62%    | 3.02%  | 2.25%  | 6.19%  | 6.73%    | 4.42%  |
| <i>No Charge</i>                | 0.10%  | 0.54%  | 0.35%    | 0.10%  | 0.20%  | 0.84%  | 1.01%    | 0.15%  | 0.21%  | 0.78%  | 0.70%    | 0.29%  |
| <i>Other</i>                    | 1.12%  | 2.14%  | 1.93%    | 1.50%  | 1.44%  | 2.71%  | 2.54%    | 1.31%  | 1.76%  | 2.36%  | 2.73%    | 2.14%  |
| <b><i>Comorbidities †</i></b>   |        |        |          |        |        |        |          |        |        |        |          |        |
| <i>HTN</i>                      | 44.72% | 72.02% | 57.60%   | 58.87% | 53.73% | 74.46% | 68.13%   | 65.84% | 63.51% | 79.13% | 69.70%   | 67.57% |
| <i>CAD</i>                      | 29.79% | 22.88% | 28.54%   | 29.92% | 32.43% | 25.76% | 29.34%   | 29.33% | 34.73% | 28.83% | 31.55%   | 32.40% |
| <i>Atrial Fibrillation</i>      | 15.96% | 8.72%  | 11.54%   | 19.52% | 18.58% | 10.85% | 13.01%   | 20.78% | 20.80% | 13.80% | 14.78%   | 18.80% |
| <i>Obese</i>                    | 17.20% | 20.43% | 15.75%   | 12.72% | 19.98% | 22.02% | 16.18%   | 14.89% | 31.78% | 33.65% | 29.96%   | 23.59% |
| <i>Valve Disease</i>            | 19.43% | 13.63% | 16.78%   | 19.82% | 20.48% | 19.00% | 17.38%   | 20.69% | 23.99% | 20.27% | 20.98%   | 23.56% |
| <i>VT</i>                       | 5.63%  | 5.20%  | 4.72%    | 2.94%  | 6.66%  | 6.33%  | 4.87%    | 3.90%  | 8.05%  | 6.79%  | 4.96%    | 5.72%  |
| <i>AMI</i>                      | 1.81%  | 1.26%  | 2.12%    | 3.12%  | 2.43%  | 1.42%  | 1.68%    | 3.15%  | 2.66%  | 1.55%  | 2.90%    | 2.86%  |
| <i>PVD</i>                      | 4.58%  | 3.58%  | 4.23%    | 2.78%  | 5.30%  | 4.23%  | 4.93%    | 4.00%  | 7.52%  | 5.56%  | 6.64%    | 6.17%  |
| <i>DM</i>                       | 31.91% | 33.93% | 38.82%   | 34.10% | 33.20% | 34.94% | 42.36%   | 40.50% | 37.08% | 39.16% | 45.00%   | 46.80% |
| <i>COPD</i>                     | 20.48% | 14.62% | 12.29%   | 11.64% | 21.14% | 15.52% | 12.21%   | 9.25%  | 21.07% | 15.49% | 11.67%   | 10.44% |
| <i>Anemia</i>                   | 15.36% | 22.42% | 19.09%   | 19.70% | 19.38% | 24.11% | 25.85%   | 20.22% | 26.05% | 33.64% | 31.78%   | 31.31% |
| <i>Fluid/Electrolyte</i>        | 18.52% | 19.94% | 16.79%   | 19.60% | 25.12% | 23.29% | 25.25%   | 26.28% | 31.54% | 31.69% | 32.87%   | 29.23% |

PI = Pacific Islander, HTN = hypertension, CAD = coronary artery disease, VT = ventricular tachycardia, AMI = acute myocardial infarction, PVD = peripheral vascular disease, DM = diabetes mellitus, COPD = chronic obstructive pulmonary disease.

† Age-standardized proportions to 2000 U.S. standard population.

Supplemental Table IV: National trends in disposition after a primary heart failure admission from the National Inpatient Sample.

|                                    | 2002   | 2003   | 2004   | 2005   | 2006   | 2007   | 2008   | 2009   | 2010   | 2011   | 2012   | 2013   |
|------------------------------------|--------|--------|--------|--------|--------|--------|--------|--------|--------|--------|--------|--------|
| <i>National (unadjusted)</i>       |        |        |        |        |        |        |        |        |        |        |        |        |
| <i>LOS (mean)</i>                  | 5.59   | 5.54   | 5.49   | 5.38   | 5.30   | 5.26   | 5.29   | 5.26   | 5.20   | 5.13   | 5.22   | 5.28   |
| <i>Died</i>                        | 4.26%  | 4.07%  | 3.95%  | 3.78%  | 3.50%  | 3.24%  | 3.29%  | 3.21%  | 3.05%  | 3.05%  | 3.09%  | 3.01%  |
| <i>Home/Home health</i>            | 74.13% | 74.56% | 73.11% | 73.08% | 73.69% | 73.11% | 73.23% | 73.22% | 72.85% | 72.13% | 72.77% | 72.83% |
| <i>SNF/ICF</i>                     | 16.85% | 16.69% | 18.09% | 18.63% | 18.43% | 19.29% | 19.34% | 19.35% | 19.97% | 20.60% | 20.11% | 20.04% |
| <i>Short-term hospital</i>         | 3.65%  | 3.51%  | 3.81%  | 3.45%  | 3.25%  | 3.17%  | 2.98%  | 3.06%  | 2.94%  | 3.02%  | 2.94%  | 2.94%  |
| <i>Other</i>                       | 1.11%  | 1.16%  | 1.03%  | 1.06%  | 1.13%  | 1.19%  | 1.16%  | 1.17%  | 1.19%  | 1.19%  | 1.10%  | 1.19%  |
| <i>National (age-standardized)</i> |        |        |        |        |        |        |        |        |        |        |        |        |
| <i>Died</i>                        | 2.46%  | 2.36%  | 2.22%  | 1.90%  | 2.00%  | 2.04%  | 1.97%  | 2.09%  | 1.82%  | 1.85%  | 1.96%  | 1.77%  |
| <i>Home/Home health</i>            | 84.45% | 85.19% | 83.94% | 84.22% | 84.45% | 84.15% | 85.13% | 83.78% | 84.90% | 84.33% | 84.77% | 84.80% |
| <i>SNF/ICF</i>                     | 5.71%  | 5.78%  | 6.31%  | 6.28%  | 6.33%  | 6.56%  | 6.27%  | 6.59%  | 6.53%  | 6.88%  | 6.78%  | 6.93%  |
| <i>Short-term hospital</i>         | 4.54%  | 4.01%  | 4.79%  | 4.61%  | 4.17%  | 4.03%  | 3.86%  | 4.29%  | 3.54%  | 3.90%  | 3.83%  | 3.50%  |
| <i>Other</i>                       | 2.84%  | 2.67%  | 2.74%  | 3.00%  | 3.04%  | 3.22%  | 2.77%  | 3.25%  | 3.21%  | 3.04%  | 2.67%  | 3.00%  |

Supplemental Table V: National trends in disposition after a primary heart failure admission by sex from the NIS.

| <i>Male (unadjusted)</i>                | 2002   | 2003   | 2004   | 2005   | 2006   | 2007   | 2008   | 2009   | 2010   | 2011   | 2012   | 2013   |
|-----------------------------------------|--------|--------|--------|--------|--------|--------|--------|--------|--------|--------|--------|--------|
| <i>LOS (mean)</i>                       | 5.51   | 5.44   | 5.36   | 5.25   | 5.19   | 5.17   | 5.21   | 5.24   | 5.16   | 5.10   | 5.24   | 5.28   |
| <i>Died</i>                             | 4.46%  | 4.11%  | 3.99%  | 3.77%  | 3.40%  | 3.13%  | 3.28%  | 3.19%  | 3.01%  | 3.06%  | 3.12%  | 3.07%  |
| <i>Home/Home health</i>                 | 77.10% | 78.01% | 76.55% | 76.86% | 77.31% | 76.88% | 76.95% | 76.68% | 76.52% | 75.59% | 76.10% | 75.84% |
| <i>SNF/ICF</i>                          | 12.86% | 12.50% | 13.73% | 13.93% | 14.01% | 14.75% | 14.86% | 15.08% | 15.49% | 16.26% | 15.98% | 16.06% |
| <i>Short-term hospital</i>              | 4.08%  | 3.90%  | 4.26%  | 3.89%  | 3.63%  | 3.57%  | 3.29%  | 3.39%  | 3.29%  | 3.41%  | 3.23%  | 3.33%  |
| <i>Other</i>                            | 1.51%  | 1.48%  | 1.47%  | 1.56%  | 1.65%  | 1.68%  | 1.62%  | 1.66%  | 1.69%  | 1.67%  | 1.57%  | 1.69%  |
| <b><i>Male (age-standardized)</i></b>   |        |        |        |        |        |        |        |        |        |        |        |        |
| <i>Died</i>                             | 2.79%  | 2.36%  | 2.39%  | 2.14%  | 2.19%  | 2.21%  | 2.01%  | 2.18%  | 2.01%  | 1.67%  | 2.15%  | 2.01%  |
| <i>Home/Home health</i>                 | 83.55% | 85.19% | 83.68% | 83.71% | 84.02% | 84.30% | 82.88% | 84.03% | 84.87% | 84.91% | 84.66% | 84.71% |
| <i>SNF/ICF</i>                          | 5.43%  | 5.11%  | 5.67%  | 5.65%  | 5.83%  | 6.16%  | 5.54%  | 6.13%  | 5.62%  | 5.96%  | 6.16%  | 6.48%  |
| <i>Short-term hospital</i>              | 4.97%  | 4.20%  | 4.97%  | 4.95%  | 4.48%  | 3.85%  | 4.25%  | 4.13%  | 3.79%  | 3.98%  | 4.03%  | 3.61%  |
| <i>Other</i>                            | 3.26%  | 3.15%  | 3.30%  | 3.56%  | 3.48%  | 3.48%  | 5.33%  | 3.53%  | 3.71%  | 18.25% | 3.00%  | 3.19%  |
| <b><i>Female (unadjusted)</i></b>       |        |        |        |        |        |        |        |        |        |        |        |        |
| <i>LOS (mean)</i>                       | 5.67   | 5.62   | 5.60   | 5.49   | 5.40   | 5.35   | 5.36   | 5.27   | 5.24   | 5.16   | 5.20   | 5.28   |
| <i>Died</i>                             | 4.09%  | 4.04%  | 3.92%  | 3.80%  | 3.59%  | 3.34%  | 3.31%  | 3.21%  | 3.09%  | 3.05%  | 3.05%  | 2.94%  |
| <i>Home/Home health</i>                 | 71.68% | 71.63% | 70.06% | 69.60% | 70.30% | 69.54% | 69.66% | 69.82% | 69.16% | 68.74% | 69.43% | 69.69% |
| <i>SNF/ICF</i>                          | 20.15% | 20.23% | 21.97% | 22.95% | 22.59% | 23.59% | 23.62% | 23.54% | 24.47% | 24.87% | 24.26% | 24.17% |
| <i>Short-term hospital</i>              | 3.29%  | 3.19%  | 3.42%  | 3.05%  | 2.88%  | 2.80%  | 2.69%  | 2.74%  | 2.60%  | 2.63%  | 2.64%  | 2.53%  |
| <i>Other</i>                            | 0.78%  | 0.90%  | 0.63%  | 0.59%  | 0.65%  | 0.72%  | 0.72%  | 0.69%  | 0.68%  | 0.71%  | 0.62%  | 0.67%  |
| <b><i>Female (age-standardized)</i></b> |        |        |        |        |        |        |        |        |        |        |        |        |
| <i>Died</i>                             | 2.05%  | 2.31%  | 2.12%  | 1.74%  | 1.75%  | 1.71%  | 2.04%  | 2.05%  | 1.61%  | 2.24%  | 1.67%  | 1.46%  |
| <i>Home/Home health</i>                 | 85.70% | 85.46% | 84.59% | 85.07% | 85.50% | 84.51% | 85.51% | 83.60% | 84.75% | 83.85% | 85.25% | 84.96% |
| <i>SNF/ICF</i>                          | 6.00%  | 6.48%  | 6.82%  | 6.74%  | 6.78%  | 6.94%  | 7.14%  | 7.09%  | 7.90%  | 7.85%  | 7.55%  | 7.66%  |
| <i>Short-term hospital</i>              | 4.02%  | 3.63%  | 4.54%  | 4.40%  | 3.58%  | 4.11%  | 3.34%  | 4.54%  | 3.31%  | 3.86%  | 3.41%  | 3.27%  |
| <i>Other</i>                            | 2.24%  | 2.12%  | 1.93%  | 2.05%  | 2.40%  | 2.73%  | 1.98%  | 2.72%  | 2.42%  | 2.20%  | 2.12%  | 2.65%  |

LOS = length of stay, Home/Home health = discharged home or with home health care services, SNF/ICF = discharged to skilled nursing facility, intermediate care facility, or another type of facility, Transfer short-term, Other = includes missing, against medical advice, discharged to court/law enforcement

Supplemental Table VI: National trends in disposition after a primary heart failure admission by race/ethnicity from the NIS.

| <b>White (unadjusted)</b>       | <b>2002</b> | <b>2003</b> | <b>2004</b> | <b>2005</b> | <b>2006</b> | <b>2007</b> | <b>2008</b> | <b>2009</b> | <b>2010</b> | <b>2011</b> | <b>2012</b> | <b>2013</b> |
|---------------------------------|-------------|-------------|-------------|-------------|-------------|-------------|-------------|-------------|-------------|-------------|-------------|-------------|
| <i>LOS (mean)</i>               | 5.58        | 5.60        | 5.46        | 5.41        | 5.25        | 5.21        | 5.25        | 5.20        | 5.17        | 5.09        | 5.16        | 5.23        |
| <i>Died</i>                     | 4.84%       | 4.61%       | 4.44%       | 4.31%       | 3.97%       | 3.73%       | 3.73%       | 3.72%       | 3.58%       | 3.57%       | 3.58%       | 3.44%       |
| <i>Home/Home health</i>         | 71.14%      | 71.55%      | 70.19%      | 70.11%      | 70.58%      | 69.60%      | 70.15%      | 69.93%      | 68.95%      | 68.33%      | 69.15%      | 69.21%      |
| <i>SNF/ICF</i>                  | 19.34%      | 19.24%      | 20.67%      | 21.22%      | 21.32%      | 22.49%      | 22.13%      | 22.34%      | 23.54%      | 24.00%      | 23.34%      | 23.30%      |
| <i>Short-term hospital</i>      | 3.84%       | 3.71%       | 3.95%       | 3.55%       | 3.39%       | 3.34%       | 3.16%       | 3.25%       | 3.13%       | 3.21%       | 3.12%       | 3.18%       |
| <i>Other</i>                    | 0.84%       | 0.90%       | 0.75%       | 0.81%       | 0.73%       | 0.83%       | 0.82%       | 0.75%       | 0.80%       | 0.89%       | 0.80%       | 0.87%       |
| <b>White (age-standardized)</b> |             |             |             |             |             |             |             |             |             |             |             |             |
| <i>Died</i>                     | 3.03%       | 2.32%       | 2.85%       | 2.42%       | 2.37%       | 2.00%       | 2.62%       | 2.66%       | 2.22%       | 2.66%       | 2.22%       | 1.89%       |
| <i>Home/Home health</i>         | 81.16%      | 84.19%      | 81.83%      | 82.79%      | 84.64%      | 83.05%      | 84.09%      | 82.88%      | 83.08%      | 81.49%      | 83.11%      | 82.97%      |
| <i>SNF/ICF</i>                  | 6.06%       | 6.53%       | 6.90%       | 7.06%       | 6.33%       | 6.73%       | 6.53%       | 7.05%       | 6.90%       | 7.88%       | 7.38%       | 7.65%       |
| <i>Short-term hospital</i>      | 7.05%       | 5.06%       | 6.22%       | 5.45%       | 4.48%       | 5.67%       | 4.62%       | 4.88%       | 5.22%       | 5.76%       | 4.83%       | 4.63%       |
| <i>Other</i>                    | 2.70%       | 1.90%       | 2.21%       | 2.29%       | 2.18%       | 2.54%       | 2.14%       | 2.53%       | 2.58%       | 2.21%       | 2.47%       | 2.87%       |
| <b>Black (unadjusted)</b>       |             |             |             |             |             |             |             |             |             |             |             |             |
| <i>LOS (mean)</i>               | 5.59        | 5.67        | 5.47        | 5.29        | 5.40        | 5.31        | 5.30        | 5.30        | 5.23        | 5.19        | 5.33        | 5.40        |
| <i>Died</i>                     | 2.55%       | 2.41%       | 2.36%       | 2.07%       | 2.05%       | 1.97%       | 1.89%       | 1.75%       | 1.72%       | 1.72%       | 1.76%       | 1.69%       |
| <i>Home/Home health</i>         | 82.41%      | 82.48%      | 80.80%      | 81.26%      | 81.33%      | 81.03%      | 81.57%      | 81.30%      | 81.24%      | 80.45%      | 80.97%      | 81.25%      |
| <i>SNF/ICF</i>                  | 10.57%      | 10.67%      | 11.94%      | 3.09%       | 11.87%      | 12.28%      | 12.26%      | 12.27%      | 12.64%      | 2.90%       | 13.03%      | 12.86%      |
| <i>Short-term hospital</i>      | 2.78%       | 2.67%       | 3.12%       | 2.95%       | 2.63%       | 2.65%       | 2.23%       | 2.42%       | 2.39%       | 2.48%       | 2.42%       | 2.21%       |
| <i>Other</i>                    | 1.69%       | 1.76%       | 1.78%       | 10.62%      | 2.12%       | 2.07%       | 2.04%       | 2.27%       | 2.02%       | 12.45%      | 1.81%       | 2.00%       |
| <b>Black (age-standardized)</b> |             |             |             |             |             |             |             |             |             |             |             |             |
| <i>Died</i>                     | 1.87%       | 2.12%       | 1.78%       | 1.50%       | 1.55%       | 1.71%       | 1.37%       | 1.78%       | 1.41%       | 1.42%       | 1.41%       | 1.28%       |
| <i>Home/Home health</i>         | 87.30%      | 86.78%      | 85.31%      | 85.40%      | 85.07%      | 84.92%      | 86.55%      | 85.24%      | 86.26%      | 85.84%      | 86.53%      | 86.84%      |
| <i>SNF/ICF</i>                  | 5.34%       | 5.35%       | 5.83%       | 6.08%       | 6.61%       | 6.54%       | 6.21%       | 6.31%       | 6.16%       | 6.41%       | 6.43%       | 6.23%       |
| <i>Short-term hospital</i>      | 2.62%       | 2.92%       | 3.94%       | 3.55%       | 3.41%       | 3.35%       | 2.62%       | 3.12%       | 2.35%       | 2.89%       | 2.94%       | 2.36%       |
| <i>Other</i>                    | 2.87%       | 2.83%       | 3.14%       | 3.46%       | 3.36%       | 3.48%       | 3.25%       | 3.55%       | 3.81%       | 3.43%       | 2.69%       | 3.28%       |

Continued Supplemental Table VI

| <i>Hispanic (unadjusted)</i>       | 2002   | 2003   | 2004   | 2005   | 2006   | 2007   | 2008   | 2009   | 2010   | 2011   | 2012   | 2013   |
|------------------------------------|--------|--------|--------|--------|--------|--------|--------|--------|--------|--------|--------|--------|
| <i>LOS (mean)</i>                  | 5.52   | 5.93   | 5.63   | 5.33   | 5.38   | 5.43   | 5.64   | 5.49   | 5.33   | 5.23   | 5.22   | 5.26   |
| <i>Died</i>                        | 3.17%  | 3.34%  | 3.28%  | 2.64%  | 2.88%  | 2.27%  | 2.62%  | 2.30%  | 2.17%  | 2.32%  | 2.31%  | 2.56%  |
| <i>Home/Home health</i>            | 81.10% | 81.46% | 79.60% | 78.36% | 80.63% | 80.89% | 79.55% | 80.00% | 80.65% | 80.12% | 80.58% | 80.32% |
| <i>SNF/ICF</i>                     | 10.38% | 10.14% | 11.56% | 11.12% | 11.69% | 12.40% | 13.00% | 13.13% | 12.66% | 13.21% | 12.77% | 13.03% |
| <i>Short-term hospital</i>         | 3.81%  | 3.23%  | 3.99%  | 3.09%  | 3.00%  | 2.75%  | 2.74%  | 2.63%  | 2.45%  | 2.90%  | 2.68%  | 2.45%  |
| <i>Other</i>                       | 1.53%  | 1.82%  | 1.57%  | 4.78%  | 1.80%  | 1.68%  | 2.09%  | 1.94%  | 2.07%  | 1.45%  | 1.66%  | 1.64%  |
| <i>Hispanic (age-standardized)</i> |        |        |        |        |        |        |        |        |        |        |        |        |
| <i>Died</i>                        | 3.75%  | 2.63%  | 1.78%  | 1.98%  | 2.46%  | 2.00%  | 2.11%  | 1.72%  | 1.09%  | 1.21%  | 1.70%  | 3.10%  |
| <i>Home/Home health</i>            | 84.74% | 83.15% | 85.94% | 82.28% | 84.58% | 87.30% | 85.58% | 84.86% | 87.28% | 86.62% | 88.17% | 85.83% |
| <i>SNF/ICF</i>                     | 4.16%  | 4.78%  | 4.88%  | 4.63%  | 4.46%  | 5.02%  | 5.21%  | 5.84%  | 5.14%  | 4.61%  | 4.76%  | 5.53%  |
| <i>Short-term hospital</i>         | 4.38%  | 4.05%  | 4.29%  | 4.98%  | 4.14%  | 2.62%  | 4.29%  | 3.54%  | 3.70%  | 4.28%  | 2.59%  | 2.76%  |
| <i>Other</i>                       | 2.96%  | 5.39%  | 3.10%  | 6.13%  | 4.37%  | 3.06%  | 2.81%  | 4.04%  | 2.79%  | 3.29%  | 2.78%  | 2.78%  |
| <i>Asian/PI (unadjusted)</i>       |        |        |        |        |        |        |        |        |        |        |        |        |
| <i>LOS (mean)</i>                  | 5.79   | 6.21   | 5.90   | 5.55   | 6.11   | 5.62   | 5.42   | 5.52   | 5.26   | 5.20   | 5.47   | 5.17   |
| <i>Died</i>                        | 3.96%  | 3.53%  | 4.10%  | 3.42%  | 3.31%  | 3.37%  | 3.46%  | 2.73%  | 2.96%  | 3.06%  | 2.52%  | 3.31%  |
| <i>Home/Home health</i>            | 81.42% | 79.89% | 77.00% | 78.28% | 78.68% | 77.87% | 77.38% | 79.40% | 77.83% | 58.05% | 79.51% | 78.29% |
| <i>SNF/ICF</i>                     | 13.54% | 4.14%  | 13.53% | 13.74% | 13.94% | 14.34% | 15.21% | 14.09% | 15.25% | 14.73% | 14.17% | 13.65% |
| <i>Short-term hospital</i>         | 3.25%  | 11.08% | 4.13%  | 3.85%  | 3.07%  | 2.93%  | 2.88%  | 2.59%  | 2.81%  | 2.78%  | 2.58%  | 3.49%  |
| <i>Other</i>                       | -2.16% | 1.36%  | 1.24%  | 0.72%  | 1.01%  | 1.48%  | 1.07%  | 1.18%  | 1.15%  | 21.38% | 1.22%  | 1.27%  |
| <i>Asian/PI (age-standardized)</i> |        |        |        |        |        |        |        |        |        |        |        |        |
| <i>Died</i>                        | 2.37%  | 1.68%  | 2.09%  | 1.27%  | 1.10%  | 3.37%  | 1.78%  | 1.93%  | 5.77%  | 2.05%  | 1.43%  | 2.27%  |
| <i>Home/Home health</i>            | 83.58% | 88.54% | 86.16% | 85.51% | 87.85% | 84.05% | 87.13% | 85.28% | 82.67% | 88.28% | 87.46% | 86.72% |
| <i>SNF/ICF</i>                     | 4.73%  | 4.14%  | 5.31%  | 5.55%  | 4.38%  | 5.19%  | 5.43%  | 4.92%  | 5.64%  | 4.79%  | 4.52%  | 4.37%  |
| <i>Short-term hospital</i>         | 4.77%  | 4.31%  | 5.27%  | 5.95%  | 3.64%  | 2.82%  | 4.09%  | 5.83%  | 3.55%  | 2.65%  | 3.60%  | 4.03%  |
| <i>Other</i>                       | 4.54%  | 1.34%  | 1.17%  | 1.72%  | 3.04%  | 4.57%  | 1.58%  | 2.04%  | 2.38%  | 2.24%  | 3.00%  | 2.61%  |

LOS = length of stay, Home/Home health = discharged home or with home health care services, SNF/ICF = discharged to skilled nursing facility, intermediate care facility, or another type of facility, Transfer short-term, Other = includes missing, against medical advice, discharged to court/law enforcement

Supplemental Table VII: Race/Ethnic classification of HF hospitalizations for 2002 and 2013 pre- and post-imputation from the National Inpatient Sample.

|                        | <b>2002</b>                  |                               | <b>2013</b>                  |                               |
|------------------------|------------------------------|-------------------------------|------------------------------|-------------------------------|
|                        | <b><u>Pre-imputation</u></b> | <b><u>Post-imputation</u></b> | <b><u>Pre-imputation</u></b> | <b><u>Post-imputation</u></b> |
| <b><i>White</i></b>    | 70.69%                       | 70.93%                        | 67.46%                       | 67.69%                        |
| <b><i>Black</i></b>    | 18.06%                       | 18.14%                        | 20.16%                       | 20.06%                        |
| <b><i>Hispanic</i></b> | 7.44%                        | 7.18%                         | 7.72%                        | 7.64%                         |
| <b><i>Asian/PI</i></b> | 1.66%                        | 1.61%                         | 2.00%                        | 1.97%                         |



Supplemental Table VIII: Measures of difference in the crude HF hospitalization rate by sex and race/ethnicity from the National Inpatient Sample.

|                 | 2002    | 2003    | 2004    | 2005    | 2006    | 2007    | 2008    | 2009    | 2010    | 2011    | 2012    | 2013    | P-trend |
|-----------------|---------|---------|---------|---------|---------|---------|---------|---------|---------|---------|---------|---------|---------|
| <b>Male</b>     |         |         |         |         |         |         |         |         |         |         |         |         |         |
| <i>Ratio</i>    | 0.88    | 0.90    | 0.94    | 0.97    | 0.99    | 1.00    | 1.01    | 1.03    | 1.06    | 1.04    | 1.06    | 1.10    | 0.001   |
| <i>Excess</i>   | -66.35  | -56.05  | -32.45  | -14.52  | -3.91   | -0.18   | 3.81    | 14.44   | 26.22   | 16.52   | 24.22   | 36.30   | 0.002   |
| <b>Male †</b>   |         |         |         |         |         |         |         |         |         |         |         |         |         |
| <b>Black</b>    |         |         |         |         |         |         |         |         |         |         |         |         |         |
| <i>Ratio</i>    | 1.57    | 1.59    | 1.73    | 1.39    | 1.77    | 1.94    | 1.71    | 1.77    | 2.11    | 1.96    | 1.91    | 1.91    | 0.015   |
| <i>Excess</i>   | 289.71  | 304.92  | 374.92  | 204.96  | 380.99  | 419.34  | 322.85  | 339.18  | 442.03  | 380.06  | 340.61  | 342.96  | 0.203   |
| <b>Hispanic</b> |         |         |         |         |         |         |         |         |         |         |         |         |         |
| <i>Ratio</i>    | 0.55    | 0.69    | 0.59    | 0.62    | 0.62    | 0.61    | 0.50    | 0.55    | 0.57    | 0.56    | 0.52    | 0.56    | 0.073   |
| <i>Excess</i>   | -226.50 | -161.50 | -212.17 | -197.26 | -187.46 | -174.49 | -224.51 | -201.60 | -171.36 | -175.18 | -178.92 | -167.56 | 0.139   |
| <b>Asian/PI</b> |         |         |         |         |         |         |         |         |         |         |         |         |         |
| <i>Ratio</i>    | 0.40    | 0.43    | 0.39    | 0.31    | 0.36    | 0.42    | 0.40    | 0.40    | 0.42    | 0.35    | 0.40    | 0.42    | 0.703   |
| <i>Excess</i>   | -304.78 | -293.79 | -311.00 | -359.61 | -316.95 | -256.51 | -273.26 | -267.40 | -232.81 | -259.83 | -225.73 | -218.80 | 0.008   |
| <b>Female ‡</b> |         |         |         |         |         |         |         |         |         |         |         |         |         |
| <b>Black</b>    |         |         |         |         |         |         |         |         |         |         |         |         |         |
| <i>Ratio</i>    | 2.11    | 2.07    | 2.19    | 1.73    | 2.23    | 2.37    | 2.12    | 2.19    | 2.54    | 2.40    | 2.31    | 2.30    | 0.054   |
| <i>Excess</i>   | 450.85  | 436.45  | 465.76  | 283.28  | 437.06  | 442.33  | 363.49  | 371.37  | 431.54  | 399.88  | 354.83  | 347.42  | 0.154   |
| <b>Hispanic</b> |         |         |         |         |         |         |         |         |         |         |         |         |         |
| <i>Ratio</i>    | 0.89    | 1.04    | 0.90    | 0.86    | 0.99    | 0.90    | 0.75    | 0.83    | 0.79    | 0.76    | 0.70    | 0.72    | 0.007   |
| <i>Excess</i>   | -46.21  | 17.95   | -39.94  | -52.36  | -2.82   | -32.18  | -79.82  | -53.23  | -60.19  | -67.47  | -79.73  | -75.40  | 0.024   |
| <b>Asian/PI</b> |         |         |         |         |         |         |         |         |         |         |         |         |         |
| <i>Ratio</i>    | 0.50    | 0.52    | 0.51    | 0.38    | 0.51    | 0.57    | 0.54    | 0.53    | 0.52    | 0.41    | 0.47    | 0.48    | 0.619   |
| <i>Excess</i>   | -203.13 | -197.53 | -190.03 | -238.50 | -173.59 | -137.62 | -150.77 | -147.08 | -134.98 | -170.17 | -142.73 | -137.38 | 0.014   |

Values are presented as ratios or excess number of admissions per 100,000.

PI = Pacific Islander, Ratio = ratio of crude hospitalization rate over reference, Excess = difference in crude hospitalization between subgroup and reference.

† reference group is female

‡ reference group is white

Supplemental Figure IA: Mean length of stay (unadjusted) by sex and race/ethnicity from the National Inpatient Sample.

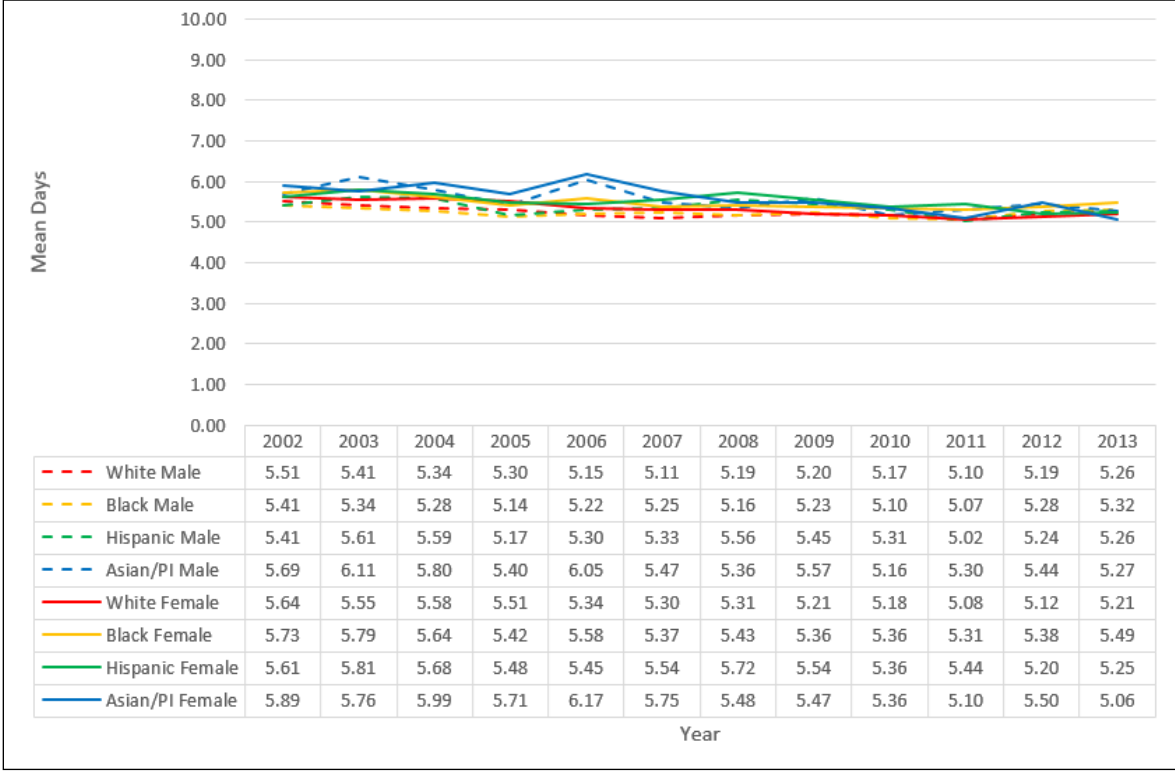

Supplemental Figure IB: Mean length of stay (age-adjusted) by sex and race/ethnicity from the National Inpatient Sample.

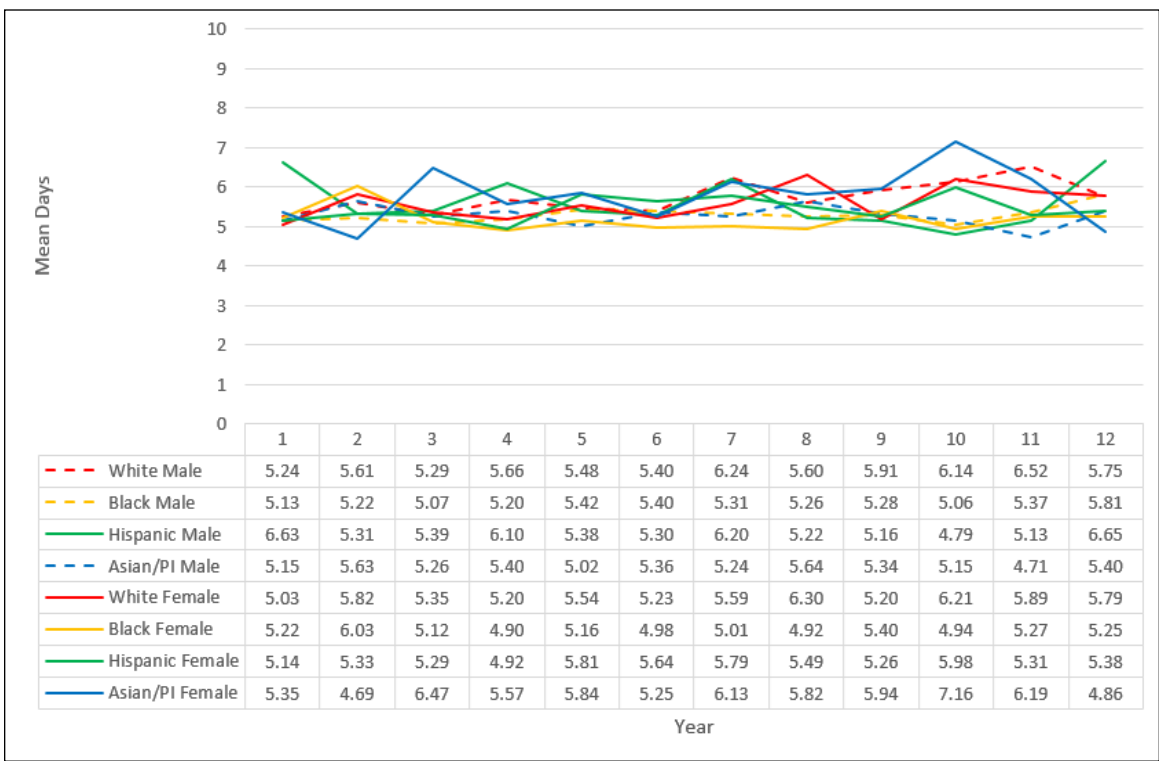

PI = Pacific Islander

Supplemental Figure IIA: Inpatient mortality rate (unadjusted) by sex and race/ethnicity from the National Inpatient Sample.

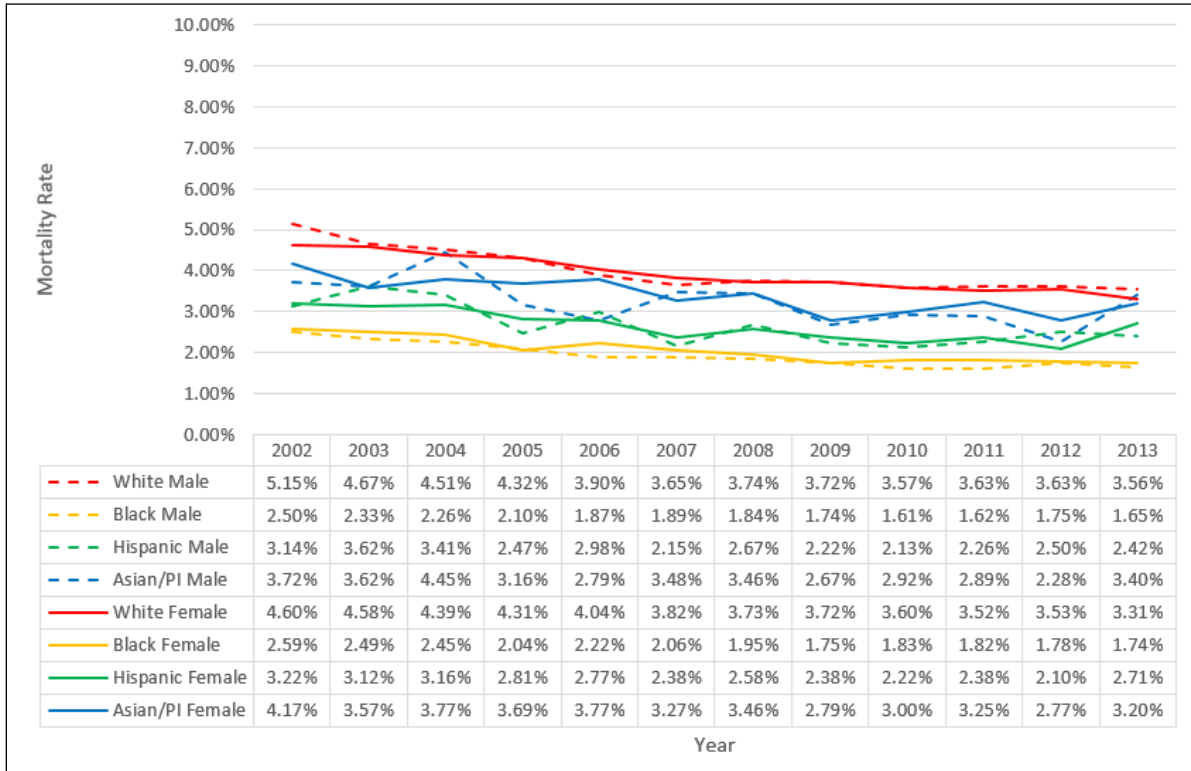

Supplemental Figure IIB: Inpatient mortality rate (age-adjusted) by sex and race/ethnicity from the National Inpatient Sample.

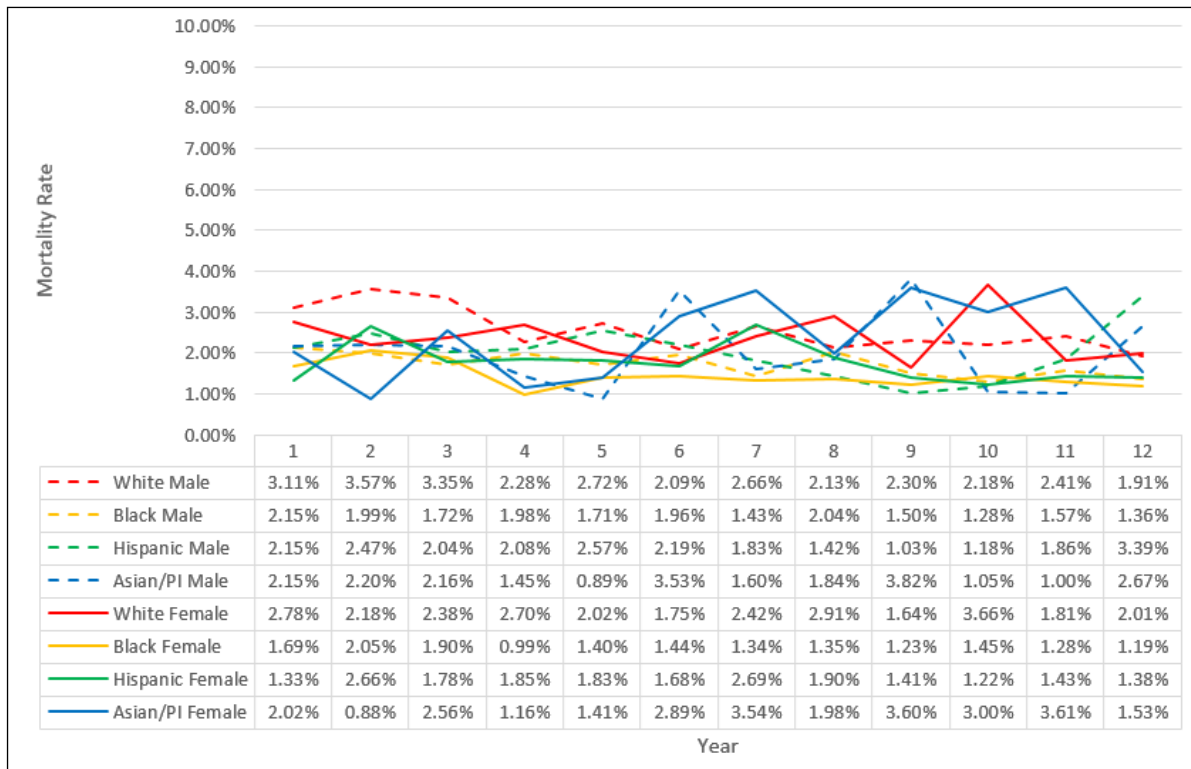

PI = Pacific Islander

Supplemental Figure IIIA: National crude hospitalization rate by sex from the National Inpatient Sample.

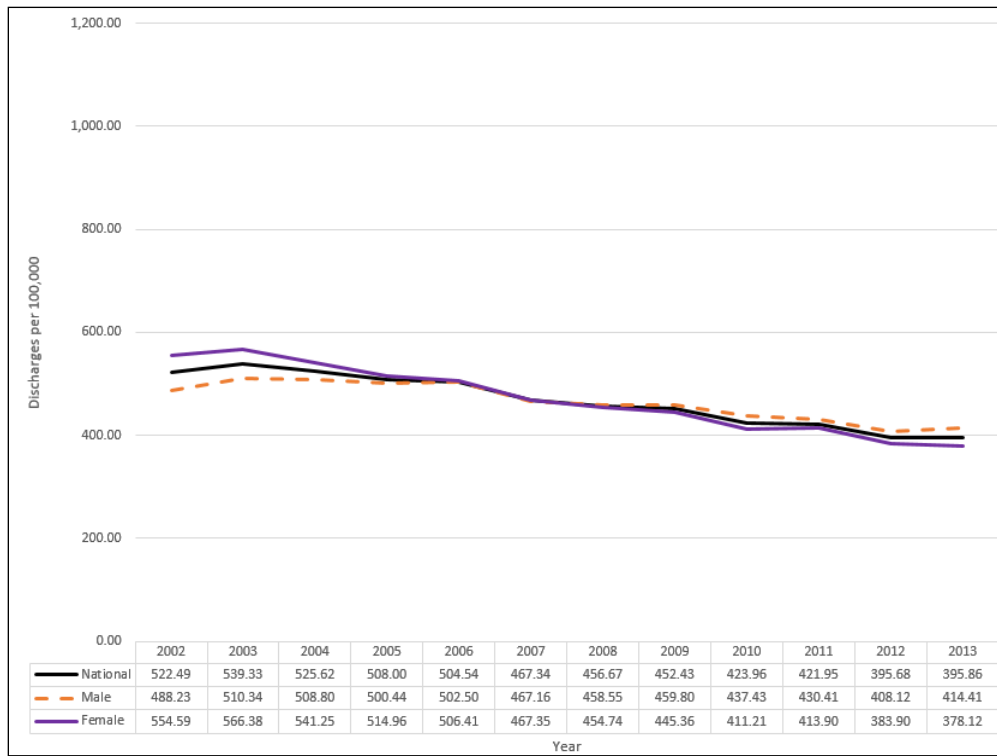

Supplemental Figure IIIB: National age-standardized hospitalization rate by sex from the National Inpatient Sample.

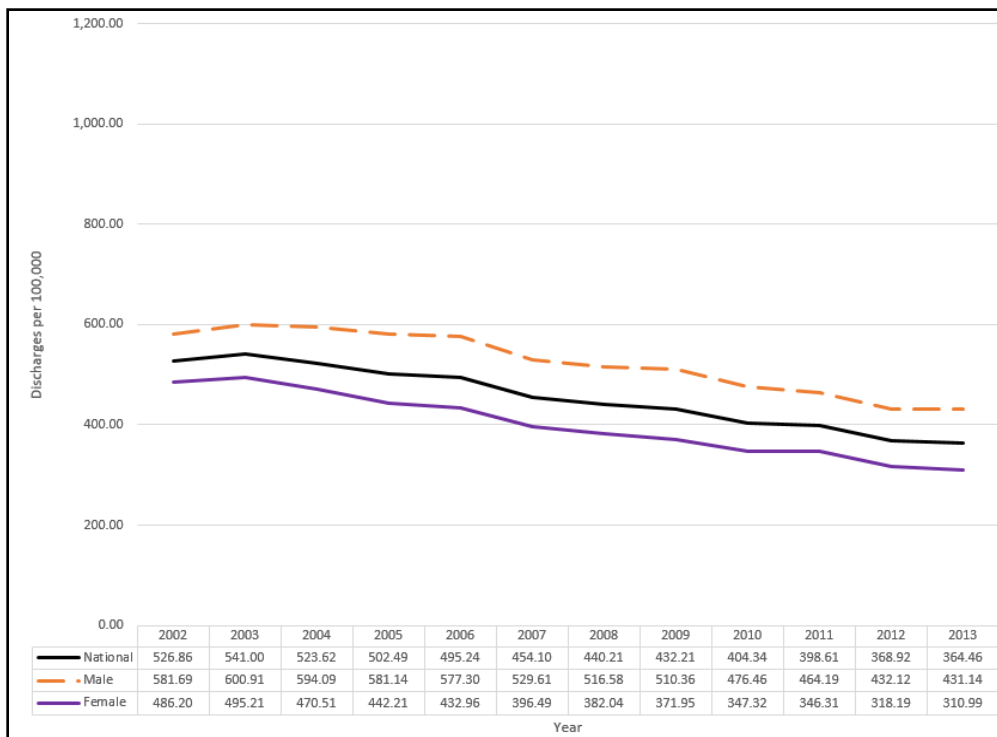

Supplemental Figure IVA: National crude hospitalization rate by race/ethnicity from the National Inpatient Sample.

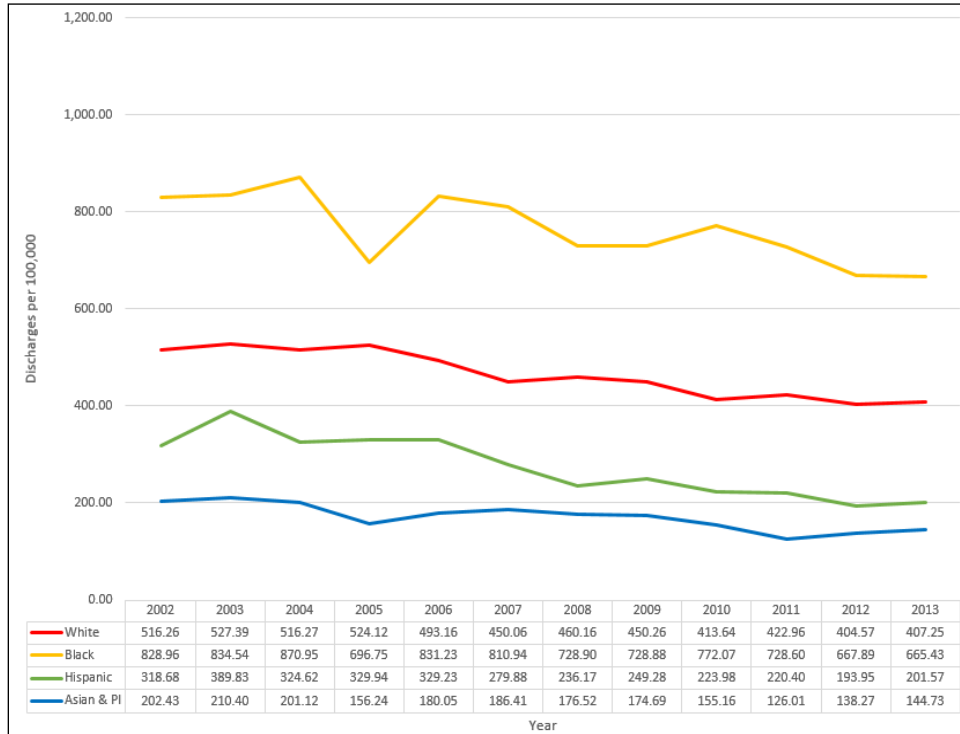

Supplemental Figure IVB: National age-standardized hospitalization rate by race/ethnicity from the National Inpatient Sample.

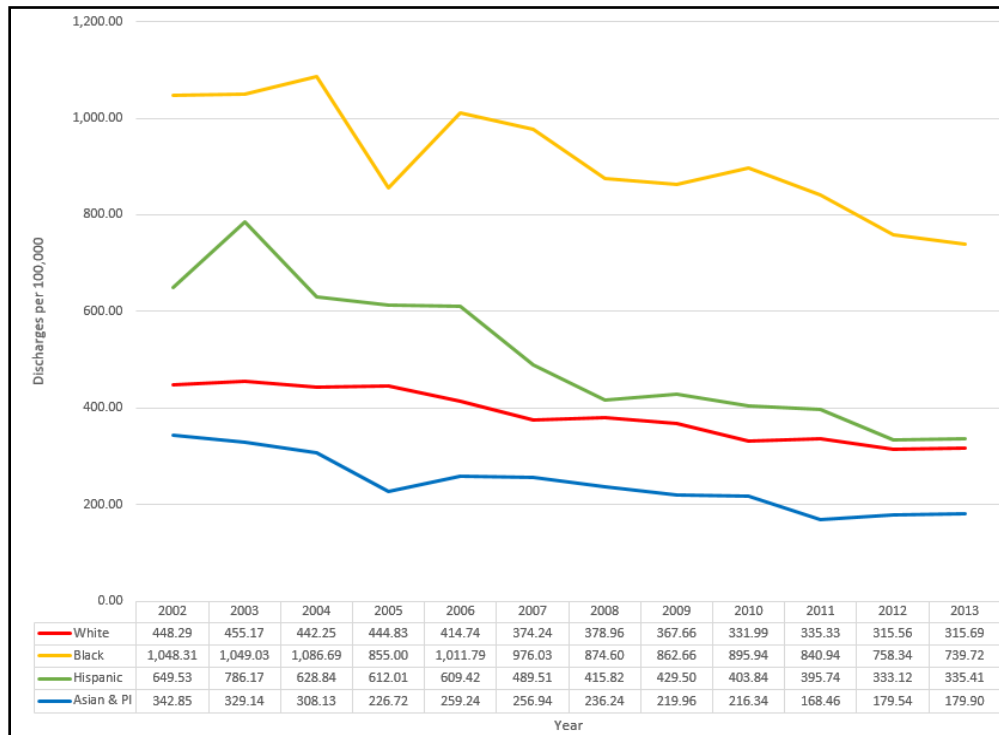

PI = Pacific Islander
